# Supplementary material
Source: PubMed Central journal article supplement (PMC4861206)

**Supplementary data**

**Soluble RAGE blocks scavenger receptor CD36-mediated uptake of hypochlorite-modified low-density lipoprotein**

Gunther Marsche, Bernd Weigle, Wolfgang Sattler, Ernst Malle

**Figure I**

ox-PAPC inhibits binding of HOCl-LDL to CD36 and SR-BI :

CHO cells overexpressing CD36 (CHO-CD36) or SR-BI (CHO-SR-BI) were incubated with <sup>125</sup>I-labeled HOCl-LDL (1 μg/ml; oxidant:protein molar ratio of 400:1) at 37°C for 2 h in the absence or presence of specific anti-CD36 or anti-SR-BI blocking antiserum (10 μl/ml) or ox-PAPC (50 μg/ml) and cell association was measured as described in Materials and Methods. Values are averages of triplicate determinations from one representative experiment out of two, and error bars represent ± SD. Characterization of biologically active phospholipids in ox-PAPC was not performed during the present study. Watson and coworkers (1, 2) and Subbanagounder et al. (3) have identified PGPC and POVPC, PEIPC and PECPC as major products formed during autooxidation of PAPC and minimally modification of LDL.

### Acknowledgements

The authors are grateful to Dr. N. N. Tandon (Otsuka American Pharmaceutical, Inc., Rockville, Maryland 20850, USA) for providing polyclonal anti-human CD36 antiserum and Dr. K.F. Kozarsky (GlaxoSmithKline, PA 19406, USA) for polyclonal rabbit anti-murine SR-BI antiserum (KKB-1).

1. Watson, A.D., Leitinger, N., Navab, M., Faull, K.F., Horkko, S., Witztum, J.L., Palinski, W., Schwenke, D., Salomon, R.G., Sha, W., Subbanagounder, G., Fogelman, A.M., and Berliner, J.A. (1997) Structural identification by mass spectrometry of oxidized phospholipids in minimally oxidized low density lipoprotein that induce monocyte/endothelial interactions and evidence for their presence in vivo. *J. Biol. Chem.* **272**, 13597-13607
2. Watson, A.D., Subbanagounder, G., Welsbie, D.S., Faull, K.F., Navab, M., Jung, M.E., Fogelman, A.M., and Berliner, J.A. (1999) Structural identification of a novel pro-inflammatory epoxyisoprostane phospholipid in mildly oxidized low density lipoprotein. *J. Biol. Chem.* **274**, 24787-24798.
3. Subbanagounder, G., Wong, J.W., Lee, H., Faull, K.F., Miller, E., Witztum, J.L., and Berliner, J.A. (2002) Epoxyisoprostane and epoxycyclopentenone phospholipids regulate monocyte chemotactic protein-1 and interleukin-8 synthesis. Formation of these oxidized phospholipids in response to interleukin-1 $\beta$ . *J. Biol. Chem.* **277**, 7271-7281.

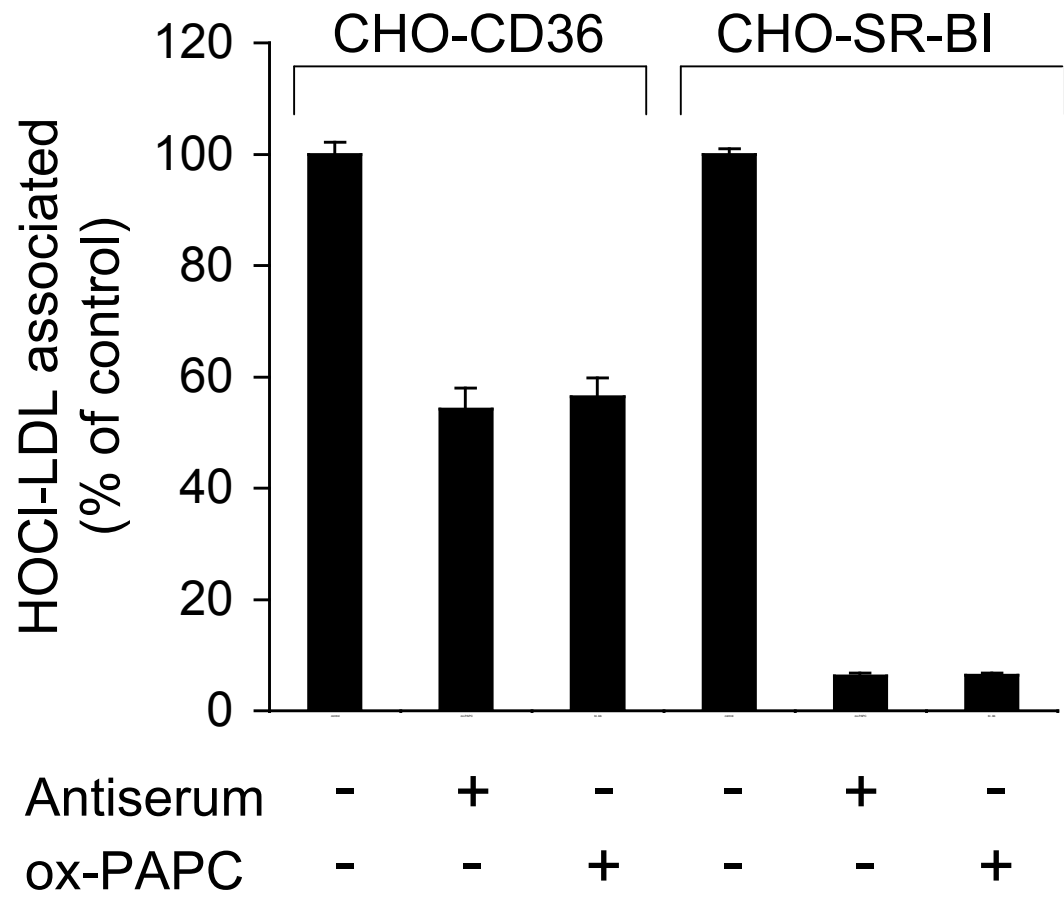

Supplement: NIHMS34551-supplement-Marsche_Supp.pdf [file NIHMS34551-supplement-Marsche_Supp.pdf]
